# Supplementary material for: Scalability of spheroid-derived small extracellular vesicles production in stirred systems
Source: Frontiers journal article supplement (doi:10.3389/fbioe.2025.1516482), 2025-04-29
Supplement: Table_2.xlsx [file Table_2.xlsx]

## Sheet: Prod EV
	Upstream																															Downstream								Volumes				ZetaView
sEV 1.4E7	Date	Cell batch	Passage	PDL	Vessel	INITIAL density (cells/cm²)	INITIAL density (cells/ml) (ML=0,2 ml/cm²)	INITIAL (total cells)	Production volume	PRODUCTION density (cells/cm²) (ALIVE + DEAD)	PRODUCTION density (cells/ml) (ML=0,12ml/cm²) (ALIVE + DEAD)	surface (mm²/mL)	LDH (mU)/mL	LDH (mU/e6 cells total)	PRODUCTION (total cells) (ALIVE + DEAD)	FINAL density (cells/cm²)	FINAL density (cells/ml) (ML=0,12/cm²)	surface (µm²/mL)	total free cell (/ml medium)	LDH (mU)/mL	LDH (mU/e6 cells total)	FINAL (total cells)	TOTAL CELLS "real" (based on medium collected after clarification)	Culture time before prod (ML establishment / spheroid formation)	Production time	Production medium	Stirring speed	Tip speed (m/s)	Power input (W/m3)	Viability (start production)	Viability (end production)	Total volume after clarification	TFF	Column midikross	Set up TFF	TFF water permeability (L/m2/h/bars) initial-final	Diafiltrations	UF	qEV IZON (Fractions) 35 nm	Volume (mL)	TFF+UF Concentrated volume (µl)	qEV Concentrated volume (µl)	Concentration factor	Clarified media scatter 85 (part/ml)	Clarified media fluo (tetraS) (part/ml)	Clarified media purity	Clarified media Scatter mode (nm)	Clarified media fluo(tetraS) mode (nm)	TFF+UF scatter 85 (part/ml)
MONOLAYER						20513.1	102565	76903860	450	87277.2	727310				3.33448e+08	95728.5	797738			14.2286	16.1648	3.29289e+08	3.12616e+08							96.88	94.1	433.2								421.467	133.333	260	1856.89	2700000000	2500000000	0.641026	125.2	70.2	3850000000000
PE-bEV-009 A	2022-08-31	Nietze	14	18.76	10 T300	20900	104500	62700000	360	64928.6	541071	541.071	/	/	1.94786e+08	76670	638917	638.917	/	/	/	230010000	1.83423e+08	3 days	24h	RPMI adv + 2mM L-glut	/	/	/	96.4	96.4	339	TFF 300Kda	Mbrane 20049597-02/22-010	50mL/min PTM 150 /200	1950 (colonne neuve)	5 Dia	Amicon 100kDa	F3 30 nm	339	110	100	3390	/	/	/	/	/	/
PE-bEV-014 A	2023-03-10	Tyrannion	11	18.89	19 T225	21187.6	105938	90576800	513	93333.3	777778	777.778	/	/	399000000	/	/		/	/	/	/	3.78778e+08	3 days	24h	RPMI adv + 2mM L-glut	/	/	/	94	/	487	TFF 300Kda	Mbrane 20082156-12/22-084	50mL/min PTM 350	Colonne Neuve 1447-869	5 Dia	Amicon 100kDa	F2/F3/F4	487	/	300	1623.33	/	/	/	/	/	/
PE-bEV-014 B	2023-05-16	Néon	12	19.54	19 T225	20033.3	100167	85642500	513	106974	891450	891.45	/	/	457313850	/	/		/	/	/	/	436810500	3 days	24h	RPMI adv + 2mM L-glut	/	/	/	98.7	/	490	TFF 300Kda	Mbrane 20082156-12/22-084	50mL/min PTM 350	814-497	5 Dia	Amicon 100kDa	F2/F3/F4	490	/	300	1633.33	/	/	/	/	/	/
PE-bEV-014 C	2023-12-12	Bertille	16	28.74	16 T225	20657.8	103289	74368000	432	82903.3	690861	690.861	/	/	298452000	101449	845407	845.407	/	12.3422	14.5991	365216000	2.77266e+08	3 days	24h	RPMI adv + 4mM L-glut + 1% P/S	/	/	/	97.2	91.8	430	TFF 300Kda	300kDa D04-E300-05-N ; SN 20104884-013	50 ml/min	2150-969	5 Dia	Amicon 100kDa	F2/F3/F4	401.333	150	300	1337.78	3900000000	2500000000	0.641026	74.4	70.2	5200000000000
PE-bEV-014 D	2023-12-19	Bertille	18	33.4	16 T225	19786.7	98933.3	71232000	432	88246.7	735389	735.389	/	/	317688000	109067	908889	908.889	/	16.1151	17.7305	392640012	2.86802e+08	3 days	24h	RPMI adv + 4mM L-glut + 1% P/S	/	/	/	98.1	94.1	420	TFF 300Kda	300kDa D04-E300-05-N ; SN 20104884-013	50 ml/min	1233-738	5 Dia	Amicon 100kDa	F2/F3/F4	390	140	300	1300	1500000000	/	/	176	/	2500000000000
SPINNER							313528	1.41088e+08	433.333	#DIV/0!	400889		4.7711	11.7242	#DIV/0!	#DIV/0!	407111		59666.7	20.8369	51.4677	#DIV/0!	1.70413e+08							96.1217	90.5544	425	#DIV/0!	#DIV/0!	#DIV/0!	#DIV/0!	#DIV/0!	#DIV/0!	#DIV/0!	406.917	150	300	1356.39	#DIV/0!	#DIV/0!	#DIV/0!	#DIV/0!	#DIV/0!	780000000000
PE-bEV-022/23 A	2024-01-27	Edouard	12	19.2735	1 Sp0,5L	/	310256	1.24103e+08	375	/	337333	80.3157	4.53728	13.4504	/	/	344889		96000	53.2873	154.506	/	1.265e+08	2 days	24h	RPMI adv + 4mM L-glutamin + 1% P/S	61 rpm	0.19	4.7	93.0582	77.1291	375	TFF 300Kda	300kDa D04-E300-05-N ; SN 20104884-013	50 ml/min	952-827	5 Dia	Amicon 100kDa	F2/F3/F4	347.222	135	300
PE-bEV-022/23 B	2024-02-02	Edouard	14	24.6941	1 Sp0,5L	/	313619	1.41129e+08	420	/	357333	85.6871	1.99007	5.56924	/	/	332000		43000	13.7146	41.3092	/	150080000	2 days	24h	RPMI adv + 4mM L-glutamin + 1% P/S	78 rpm	0.24	8.7	97.3173	92.4242	420	TFF 300Kda	300kDa D04-E300-05-N ; SN 20104884-013	50 ml/min	826-637	5 Dia	Amicon 100kDa	F2/F3/F4	393.75	160	300	1312.5	/	/	/	/	/	560000000000
PE-bEV-022/23 D	2024-02-23	Vincent	15	25.1	1 Sp0,5L	/	315464	1.41959e+08	440	/	437333	97.9335	7.06332	16.7113	/	/	494667		67000	23.409	48.7687	/	183680000	2 days	24h	RPMI adv + 4mM L-glutamin + 1% P/S	78 rpm	0.24	8.7	94.6975	90.28	420	TFF 300Kda	300 kDa DO4-E300-05-N ; SN: 2104884-008	50 ml/min	886-508	5 Dia	Amicon 100kDa	F2/F3/F4	392	150	300	1306.67	/	/	/	/	/	1000000000000
PE-bEV-022/23 E	2024-03-08	Béa	13	20.9	1 Sp0,5L	/	311501	1.40175e+08	440	/	408000	107.938	5.25989	12.8919	/	/	394667		69000	25.387	64.3252	/	177480000	2 days	24h	RPMI adv + 4mM L-glutamin + 1% P/S	78 rpm	0.24	8.7	96.3504	88.959	435	TFF 300Kda	300 kDa DO4-E300-05-N ; SN: 2104884-008	50 ml/min	949-/	5 Dia	Amicon 100kDa	F2/F3/F4	435	140	300	1450	/	/	/	/	/	/
Ambr250							310279	1.49749e+08			319278		23.5667	73.7473			350000		26000	28.3379	80.754		1.18271e+08					0.41		94.4152	89.4567	370	#DIV/0!	#DIV/0!	#DIV/0!	#DIV/0!	5	#DIV/0!	#DIV/0!	356.667	141.25	296.25	1204.68						2750000000000
PE-bEV-17/18 B	2023-10-20	Emilie	15	25.58	Ambr250 dual pitch-blade #2A23	/	305042	1.40319e+08	490	/	306000	128.964	21.5943	70.5696	/	/	308444		37000	19.6588	63.7353	/	97920000	2 days	24h	RPMI adv + 4mM L-glutamin + 1% P/S	300 rpm	0.41	9	94.2717	86.3183	320	TFF 300 kDa	Mbrane 20082156-12/22-164	50 ml/min ; PTM ~180 ?	2081-576	5	Amicon 100 kDa	F2/F3/F4	320	145	300	1066.67	/	/	/	/	/	/
PE-bEV-17/18 C	2023-10-27	Bruno	12	18.77	Ambr250 dual pitch-blade #2A23	/	310535	1.52162e+08	490	/	332000	150.633	25.4762	76.7355	/	/	351556		27000	42.7694	121.658	/	119520000	2 days	24h	RPMI adv + 4mM L-glutamin + 1% P/S	300 rpm	0.41	9	94.9438	90.8648	360	TFF 300 kDa	Mbrane 20082156-12/22-164	50 ml/min ; PTM ~180 ?	1231-536	5	Amicon 100 kDa	F3/F4/F5	360	140	285	1263.16	/	/	/	/	/	/
PE-bEV-17/18 D	2023-11-10	Bruno	16	29.1	Ambr250 dual pitch-blade #2A23	/	315532	1.54611e+08	490	/	316000	124.502	23.1952	73.4025	/	/	368000		17500	25.0747	68.1378	/	126400000	2 days	24h	RPMI adv + 4mM L-glutamin + 1% P/S	300 rpm	0.41	9	95.24	90.2415	400	TFF 300 kDa	Mbrane 20082156-12/22-164	50 ml/min ; PTM ~280 ?	1001-516	5	Amicon 100 kDa	F2/3/4	373.333	140	300	1244.44	/	/	/	/	/	2200000000000
PE-bEV-17/18 E	2023-11-17	JP	14	23.81	Ambr250 dual pitch-blade #2A23	/	310007	1.51903e+08	490	/	323111	170.295	24.0012	74.2817	/	/	372000		22500	25.8485	69.4853	/	1.29244e+08	2 days	24h	RPMI adv + 4mM L-glutamin + 1% P/S	300 rpm	0.41	9	93.2054	90.4023	400	TFF 300 kDa	Mbrane 20082156-12/22-164	50 ml/min ; PTM ~280 ?	854-546	5	Amicon 100 kDa	F2/3/4	373.333	140	300	1244.44	/	/	/	/	/	3300000000000
[truncated: 36 more columns]

## Sheet: Scale-up 0,125L > 0,5L SpF
	0,125L SpF 90 rpm					0.5L SpF
	0,125L SpF 90 rpm					90 rpm					Vtip constant = 61 rpm					P/V constant = 75 rpm
	ID	Hour	spheroids/ml	spheroids size (µm)		ID	Hour	spheroids/ml	spheroids size (µm)		ID	Hour	spheroids/ml	spheroids size (µm)		ID	Hour	spheroids/ml	spheroids size (µm)
	25A1	24	2200	131.231		22F	24	/	/		22G	24	2293.33	136.082		22J	24	/	/
	25B1	24	2013.33	127.114		22H	24	2816.67	112.075		22i	24	1526.67	134.456		22L	24	2480	131.451
	25B2	24	1506.67	137.649		22K	24	1966.67	108.744		22M	24	/	/		22N	24	/	/
	25C1	24	2413.33	152.714		22F	48	1032.14	159.781		22G	48	686.667	220.87		22O	24	/	/
	25C2	24	2140	153.559		22H	48	881.25	154.787		22i	48	387.5	207.221		22J	48	743.333	179.528
		48				22K	48	/	/		22M	48	/	/		22L	48	/	/
	25B1	48	943.333	202.344		22F	72	538.333	197.708		22G	72	348.75	251.402		22N	48	606.667	200.51
	25B2	48	610	193.997		22H	72	593.333	173.78		22i	72	253	247.176		22O	48	/	/
	25C1	48	673.333	214.008		22K	72	460	188.415		22M	72	323.333	273.768		22J	72	469	219.772
	25C2	48	646.667	198.714												22L	72	571.667	205.364
	25A1	72	473.333	205.19												22N	72	335	229.736
	25B1	72	620	204.757												22O	72	455	224.672
	25B2	72	456.667	230.312
	25C1	72	484	224.68
	25C2	72	484	241.421

## Sheet: PV impact on spheroid size
	60 rpm					90 rpm					120 rpm
	ID	Hour	spheroids/ml	spheroids size (µm)		ID	Hour	spheroids/ml	spheroids size (µm)		ID	Hour	spheroids/ml	spheroids size (µm)
	19A	24	900	156.488		15C - Sp5	24	1993.33	122.059		19A	24	2640	118.011
	19C	24	1675.56	122.317		15D - Sp5	24	1646.67	163.16		19B	24	3041.67	112.016
	19D	24	1433.33	137.971		15F - Sp5	24	1616.67	144.809		19C	24	4622.22	92.7624
	19E	24	2691.67	121.745		15F - Sp6	24	1558.33	161.612		19D	24	4050	94.4457
	19F_2	24	1613.33	144.886		15G - Sp5	24	2025	157.524		19F_1	24	3725	115.513
	19A	48	133.333	206.845		15G - Sp6	24	1550	142.278		19F_2	24	3583.33	120.251
	19C	48	588.889	204.407		15H - Sp5	24	3250	136.085		19A	48	1160	161.969
	19D	48	453.333	171.923		15H - Sp6	24	1783.33	119.467		19B	48	1136.67	140.285
	19E	48	456.667	249.982		15C - Sp5	48	620	180.712		19C	48	1413.33	120.84
	19F_2	48	413.333	212.083		15D - Sp5	48	364.444	222.17		19D	48	1325	145.549
	19A	72	51.6667	265.211		15F - Sp5	48	616.667	191.07		19F_1	48	1440	135.775
	19C	72	23.3333	296.454		15F - Sp6	48	804.167	197.238		19F_2	48	1273.33	148.503
	19D	72	185	274.296		15G - Sp5	48	479.167	213.745		19A	72	455	188.379
	19E	72	238.333	324.595		15G - Sp6	48	329.167	227.832		19B	72	306.667	187.374
	19F_2	72	251.667	272.017		15H - Sp5	48	1137.5	189.346		19C	72	533.333	163.534
						15H - Sp6	48	812.5	198.639		19D	72	560	189.341
						15C - Sp5	72	350	262.929		19F_1	72	327.778	157.551
						15D - Sp5	72	110	278.237		19F_2	72	594.444	171.005
						15F - Sp5	72	420	247.744
						15F - Sp6	72	323.333	262.284
						15G - Sp5	72	233.333	234.307
						15G - Sp6	72	443.333	232.506
						15H - Sp5	72	450	213.9
						15H - Sp6	72	330	249.467

## Sheet: µmax ambr vs spf
	STBR
	24	48	µmax
	0.37284	-0.0194471	0
	-0.0753623	0.10269	0.0074
	-0.0914657	-0.137986	0
	0.0533652	-0.137986	0
	0.0837963	0.0219789	0
	-0.0164305	0.144581	0.0067
	0.0973283	0.197028	0.0042
	0.187248	0.169899	0
	0,5 L SpF
	24	48	µmax
	-0.0833816	0.0892311	0.0072
	0.109353	0.295154	0.0077
	0.252055	0.434664	0.0076
	0.376913	0.441833	0.0027

## Sheet: Ambr250 STBr EV production
Ambr250 STBr EV production : RPMI-1640 advanced w/o FBS + 4mM glutamine
															Y = 0,0006783*X + 2,857
				Cell count total (after trypsine dissociation)					Free cell count				LDH				Surface (µm²/mL)												Metabolites
Day	Experiment ID	cell-cell0	ln(Xt/X0)	alive/ml (TRYPSalive)	alive/mL (x1e6 cells)	dead/ml (TRYPSdead)	total/ml (TRYPStot)	Viability (BT, %) (Trypsin)	alive free cell/ml (FCalive)	Dead free cell/ml (FCdead)	Total free cell/ml (FCtot)	Viability FC (BT, %) (FC)	LDH (mU/ml)	LDH (mU/e6 total cells)	lysed cell	Viability (based on LDH)	spheroid	free cell	total	mean during EV production	% FC	Volume (ml)	% medium renewal	Total cells (Volume*tot cell TRYPS)	spheroids/ml	spheroids size (µm)	spheroid viable cells (TRYPSalive-FCalive)	cells/spheroid	Glucose (g/l)	Glucose (mM)	Glucose consumption rate ( Δ/1e6 cell) vs T-1	Ammonium (mM)	Ammonium production rate ( Δ/1e6 cell) vs T-1	Lactate (mM)	Lactate production rate ( Δ/1e6 cell) vs T-1	Glutamine (mM)	Glutamine consumption rate ( Δ/1e6 cell) vs T-1	gluc0-gluc	cell = f(gluc)	Ammonium-Ammonium0	glut/ammonium	lac-lac0	GLUC/LAC	glut0-glut	cell = f(glutamine)
Day 0	B1		0	300000	0.3	5042.02	305042	98.3558	300000	5042.02	305042	98.3558						single cell size (µm)				230		7.01597e+07					2.10233	11.6695		1.06994		0.00261		4.9574		0	0	0	0.5451	0	0.7314	0	0
	B2		0	300000	0.3	5042.02	305042	98.3558	300000	5042.02	305042	98.3558						14.7824				230		7.01597e+07					2.10233	11.6695		1.06994		0.00261		4.9574		0	25822	0	1.3664	0	1.066	0	65624
	C1		0	300000	0.3	10534.7	310535	96.5952	300000	10534.7	310535	96.5952										245		7.6081e+07					2.19796	12.2003		0.02989		0		4.12334		0	0	0		0	1.104	0	9183.2
	C2		0	300000	0.3	10534.7	310535	96.5952	300000	10534.7	310535	96.5952										245		7.6081e+07					2.19796	12.2003		0.02989		0		4.12334		0	0	0	3.4165	0	1.2025	0	0
	D3		0	300000	0.3	15532.1	315532	95.249	300000	15532.1	315532	95.249										245		7.73054e+07					2.05907	11.4294		1.23906		0.00682		4.40951		0	0	0	0.8867	0	2.3753	0	0
	D4		0	300000	0.3	15532.1	315532	95.249	300000	15532.1	315532	95.249										245		7.73054e+07					2.05907	11.4294		1.23906		0.00682		4.40951		0	0	0	0.4449	0	1.5954	0	0
	E3		0	300000	0.3	10007.1	310007	96.7871	300000	10007.1	310007	96.7871										245		7.59517e+07					2.15401	11.9564		0.7173		0.02135		4.88315		0	19871	0	1.1122	0	0.9604	0	74688
	E4		0	300000	0.3	10007.1	310007	96.7871	300000	10007.1	310007	96.7871										245		7.59517e+07					2.15401	11.9564		0.7173		0.02135		4.88315		0	0	0	0.5042	0	0.6267	0	0
Day 1	B1	135556	0.37284	435556	0.435556	3555.56	439111	99.1903	46000	10000	56000	82.1429	10	22.7733	10530.7	97.6393	80.8094	38.4439	119.253		12.753			0	5966.67	65.6584	383111	64.2086	1.97314	10.9524	0.0686002	1.99903	0.0888798	2.27799	0.21767	3.74178	0.11629	0.717101		0.92909		2.27538		1.21562
	B2	0	-0.0753623	278222	0.278222	1777.78	280000	99.3651	38000	14000	52000	73.0769	6.16625	22.0223	4878.75	98.2767	83.6698	35.6979	119.368		18.5714			0	5644.44	68.6908	228000	40.3937	1.88841	10.4821	0.177828	1.7204	0.0974131	2.32868	0.348353	3.73878	0.182501	1.18742		0.65046		2.32607		1.21862
	C1	0	-0.0914657	273778	0.273778	3555.56	277333	98.7179	42000	3000	45000	93.3333	7.84461	28.2859	7353.11	97.3845	159.86	30.8924	190.753		16.226			0	8850	75.827	232333	26.2524	2.03102	11.2737	0.141027	1.32826	0.197601	1.53616	0.233791	3.9982	0.0190453	0.926641		1.29837		1.53616		0.12514
	C2	16444.4	0.0533652	316444	0.316444	8000	324444	97.5342	66000	3000	69000	95.6522	12.4311	38.315	14114.8	95.73	101.126	47.3684	148.494		21.2671			0	6066.67	72.8418	255444	42.1062	/	/	/	/	/	/	/	/	/	/		/		/		/
	D3	26222.2	0.0837963	326222	0.326222	12444.4	338667	96.3255	55000	10000	65000	84.6154	7.11084	20.9966	6271.33	98.1138	145.666	44.6224	190.289		19.1929			0	7533.33	78.4533	273667	36.3274	1.87916	10.4307	0.12755	1.53276	0.0375128	2.24587	0.285982	4.05995	0.0446475	0.998635		0.2937		2.23905		0.34956
	D4	0	-0.0164305	295111	0.295111	18666.7	313778	94.051	49000	3000	52000	94.2308	7.68916	24.5051	7123.92	97.6429	159.722	35.6979	195.42		16.5722			0	7440	82.6648	261778	35.1852	1.89297	10.5074	0.130174	1.41311	0.0245741	2.31039	0.32524	3.79831	0.0862952	0.921979		0.17405		2.30357		0.6112
	E3	30666.7	0.0973283	330667	0.330667	9777.78	340444	97.1279	80000	13000	93000	86.0215	8.42857	24.7576	8214.02	97.5761	132.521	63.8444	196.365		27.3172	238		8.10258e+07	7916.67	72.9955	247444	31.2561	1.8575	10.3105	0.207391	1.20729	0.0617427	1.52075	0.188936	4.00857	0.110204	1.64585		0.48999		1.4994		0.87458
	E4	61777.8	0.187248	361778	0.361778	13333.3	375111	96.4455	73000	5000	78000	93.5897	8.42857	22.4695	8214.02	97.7799	127.891	53.5469	181.438		20.7938	238		8.92764e+07	7283.33	74.7619	297111	40.7933	1.95421	10.8473	0.12773	1.31023	0.0682889	1.73883	0.197806	4.02582	0.0987404	1.10904		0.59293		1.71748		0.85733
Day 2	B1	0	-0.0194471	294222	0.294222	5333.33	299556	98.2196	26000	18000	44000	59.0909	20.6452	68.9193	26224.6	91.8162	91.967	30.2059	122.173		14.6884			0	3366.67	93.2483	255556	75.9076	1.71249	9.5056	0.204891	2.36554	0.0519038	3.33613	0.14985	3.06945	0.0952129	2.1639		1.2956		3.33352		1.88795
	B2	32444.4	0.10269	332444	0.332444	7111.11	339556	97.9058	32000	22000	54000	59.2593	22.5434	66.391	29023.2	91.9707	74.0835	37.0709	111.154		15.9031			0	2844.44	91.0515	285556	100.391	1.66205	9.22562	0.157478	2.39594	0.0846683	3.66809	0.167874	3.24438	0.0619652	2.44388		1.326		3.66548		1.71302
	C1	0	-0.137986	261333	0.261333	8888.89	270222	96.7105	55000	18000	73000	75.3425	21.416	79.2534	27361.1	90.5225	107.936	50.1144	158.05		27.0148			0	3544.44	98.4541	197222	55.6426	1.80848	10.0384	0.196949	1.92632	0.095354	2.69332	0.184496	3.22186	0.123779	2.1619		1.89643		2.69332		0.90148
	C2	0	-0.137986	261333	0.261333	8888.89	270222	96.7105	53000	11000	64000	82.8125	29.5363	109.304	39332.7	86.9182	123.72	43.9359	167.656		23.6842			0	4122.22	97.7415	206222	50.027	1.83589	10.1906	/	2.04713	/	3.03982	/	3.34521	/	2.00976		2.01724		3.03982		0.77813
	D3	6666.67	0.0219789	306667	0.306667	13333.3	320000	95.8333	46000	25000	71000	64.7887	23.4843	73.3886	30410.3	90.9782	49.6851	48.7414	98.4265		22.1875			0	2166.67	85.4362	249000	114.923	1.73191	9.61339	0.111053	2.13032	0.0811902	3.49301	0.169448	3.47371	0.0796522	1.81598		0.89126		3.48619		0.9358
	D4	46666.7	0.144581	346667	0.346667	19555.6	366222	94.6602	60000	20000	80000	75	22.906	62.5468	29557.8	92.1436	84.603	54.9199	139.523		21.8447			0	3855.56	83.5746	286222	74.2363	1.70715	9.47595	0.123971	2.03283	0.0744856	3.54456	0.148338	3.41303	0.0463077	1.95342		0.79377		3.53774		0.99648
	E3	65333.3	0.197028	365333	0.365333	16000	381333	95.8042	48000	21000	69000	69.5652	25.4606	66.7673	33323.9	91.641	159.399	47.3684	206.768		18.0944	225		85800000	6293.33	89.79	312333	49.6292	1.75325	9.73184	0.0659974	1.82253	0.0701688	2.60027	0.12312	3.48089	0.0601825	2.22452		1.10523		2.57892		1.40226
	E4	55555.6	0.169899	355556	0.355556	13333.3	368889	96.3855	40000	14000	54000	74.0741	22.5419	61.1075	29020.9	92.4538	121.692	37.0709	158.763		14.6386	225		8.3e+07	6160	79.2987	314889	51.1183	1.63217	9.05976	0.20948	1.76603	0.0534141	2.5604	0.0962777	3.45463	0.0669363	2.8966		1.04873		2.53905		1.42852
Day 2 (reseeding)	B1			277333	0.277333	12000	289333	95.8525	25000	4000	29000	86.2069					99.8586	19.9085	119.767		10.023		78.4314	0	3655.56		260333	71.2158	/	/		/		/		/		/		/		/		/
	B2			308000	0.308	14666.7	322667	95.4545	23000	5000	28000	82.1429					118.939	19.222	138.161	128.964	8.67769		80.6045	0	4566.67		294667	64.5255	/	/		/		/		/		/		/		/		/
	C1			311111	0.311111	3555.56	314667	98.8701	47000	13000	60000	78.3333					99.8153	41.1899	141.005		19.0678		74.5287	0	3277.78		254667	77.6949	2.09036	11.6031		1.3841		0.80996		4.31317		0		0		0		0
	C2			344000	0.344	5333.33	349333	98.4733	48000	13000	61000	78.6885					118.384	41.8764	160.261	150.633	17.4618		74.5287	0	3944.44		288333	73.0986	1.96698	10.9182		1.21994		0.73748		4.04487		0		0		0		0
	D3			327111	0.327111	4444.44	331556	98.6595	26000	5000	31000	83.871					107.524	21.2815	128.805		9.34987		81.2641	0	4688.89		300556	64.0995	1.99829	11.092		1.17594		0.72884		4.23086		0		0		0		0
	D4			293333	0.293333	7111.11	300444	97.6331	24000	14000	38000	63.1579					94.1116	26.087	120.199	124.502	12.6479		78.5219	0	4288.89		262444	61.1917	1.93128	10.72		1.14194		0.85826		4.15549		0		0		0		0
	E3			314667	0.314667	19555.6	334222	94.1489	49000	4000	53000	92.4528	3.18227	9.52141	479.531	99.8478	152.307	36.3844	188.692		15.8577	220	90.9091	7.35289e+07	6013.33		281222	46.7664	2.10829	11.7026		0.46862		0.2743		4.93457		0		0		0		0
	E4			296000	0.296	16000	312000	94.8718	39000	5000	44000	88.6364	8.46552	27.1331	8268.49	97.2825	121.692	30.2059	151.898	170.295	14.1026	220	72.7273	68640000	6160		268000	43.5065	1.9699	10.9344		0.97054		0.71808		4.26981		0		0		0		0
Day 3 (24h after medium changed)	B1	13333.3		290667	0.290667	10666.7	301333	96.4602	26000	38000	64000	40.625	20.0124	66.4129	25291.8	91.9952	74.869	43.9359	118.805		21.2389			0	2700	93.9494	237333	87.9012	1.399	7.76549	/	1.06973	/	1.10696	/	3.08514	/	/		/		/		/
	B2	0		305778	0.305778	9777.78	315556	96.9014	24000	36000	60000	40	19.3052	61.1785	24249.2	92.6524	72.1904	41.1899	113.38		19.0141			0	2283.33	100.318	255556	111.922	1.90776	10.5895	/	1.66328	/	1.5992	/	3.64958	/	/		/		/		/
	C1	56000		367111	0.367111	7111.11	374222	98.0998	43333.3	29333.3	72666.7	59.633	41.8296	111.777	57456.2	86.4671	105.307	49.8856	155.192		19.4181			0	3566.67	96.9441	301556	84.5483	1.97716	10.9747	0.0713163	1.90167	0.0587436	1.70465	0.101546	3.72481	0.0667781	0.628344		0.51757		0.89469		0.58836
	C2	0		320889	0.320889	8000	328889	97.5676	32666.7	24666.7	57333.3	56.9767	43.7093	132.9	60227.4	84.1971	100.375	39.3593	139.734		17.4324			0	3422.22	96.6235	271556	79.3506	1.92309	10.6746	0.0316338	1.75693	0.0697269	1.65351	0.118944	3.70001	0.0447793	0.243622		0.53699		0.91603		0.34486
	D3	0		290667	0.290667	20444.4	311111	93.4286	34000	21000	55000	61.8182	23.4843	75.4854	30410.3	90.5286	84.1766	37.7574	121.934		17.6786			0	3040	93.8824	256111	84.2471	1.82758	10.1444	0.135833	1.59806	0.0605103	1.57367	0.121105	3.90285	0.0470198	0.947568		0.42212		0.84483		0.32801
	D4	114667		408000	0.408	16888.9	424889	96.0251	27000	14000	41000	65.8537	26.6651	62.7577	35099.6	92.0786	81.9967	28.1465	110.143		9.64958			0	3800	82.8765	383889	101.023	1.8508	10.2733	0.0456213	1.63765	0.050624	1.87673	0.10401	3.87817	0.0283211	0.446724		0.49571		1.01847		0.27732
	E3	24000		338667	0.338667	11555.6	350222	96.7005	46000	21000	67000	68.6567	22.0246	62.8876	28258.3	92.2986	106.086	45.9954	152.081		19.1307			0	5000	82.1806	283222	56.6444	2.03656	11.3044	0.0489856	1.19974	0.0899508	0.98522	0.0874656	3.93088	0.123485	0.398155		0.73112		0.71092		1.00369
	E4	78222.2		374222	0.374222	19555.6	393778	95.0339	43000	24000	67000	64.1791	29.6724	75.3532	39533.3	90.4453	112.889	45.9954	158.884		17.0147			0	4760	86.8855	326778	68.6508	1.92852	10.7047	0.0255741	1.51394	0.0605033	1.50928	0.0880938	3.86924	0.0446003	0.22969		0.5434		0.7912		0.40057

## Sheet: 0.5L SpF production
0.5L SpF EV production : RPMI-1640 advanced w/o FBS + 4mM glutamine
				Cell count total (after trypsine dissociation)					Free cell count				LDH				Surface (µm²/mL)									Metabolites
Day	Experiment ID	cell-cell0	ln(Xt/X0)	alive/ml (TRYPSalive)	alive/ml (TRYPSalive) x1e6	dead/ml (TRYPSdead)	total/ml (TRYPStot)	Viability (BT, %) (Trypsin)	alive free cell/ml (FCalive)	Dead free cell/ml (FCdead)	Total free cell/ml (FCtot)	Viability FC (BT, %) (FC)	LDH (mU/ml)	LDH (mU/e6 total cells)	lysed cells LDH	Viability (based on LDH)	spheroid	free cell	total	%FC	% medium renewal	spheroids/ml	Spheroids size (µm)	Aggr. cells (TRYPStot-FCtot)	cells/spheroids	Glucose (g/l)	Glucose (mM)	Glucose consumption rate ( Δ/1e6 cell) vs T-1	Ammonium (mM)	Ammonium production rate ( Δ/1e6 cell) vs T-1	Lactate (mM)	Lactate production rate ( Δ/1e6 cell) vs T-1	Glutamine (mM)	Glutamine consumption rate ( Δ/1e6 cell) vs T-1	gluc0-gluc	cell = f(glucose)	ammonium-ammonium0	glutamine/ammonium	lac-lac0	gluc/lac	glut0-glut	cell = f(glutamine)
															Y = 0,0006783*X + 2,857			single cell size (µm)
																		14.7824
																											11.3099		1.03312		0		4.3601
Day 0	22B		0	300000	0.3	13619.2	313619	95.6347	300000	13619.2	313619	95.6347														2.08161	11.5545		1.24469		0		4.23952			19757	0	0.634	0	1.8375	0	23111
	22C		0	300000	0.3	17452.4	317452	94.5496	300000	17452.4	317452	94.5496														1.99348	11.0653		0.82154		0		4.48068			34835	0	0.8028	0	1.2147	0	55505
	22D		0	300000	0.3	15463.9	315464	95.2802	300000	15463.9	315464	95.2802																								49058		0.9989		1.5653		125759
	22E		0	300000	0.3	11500.8	311501	96.3157	300000	11500.8	311501	96.3157																								43811		0.923		0.7227		61327
Day 1	22B	0	-0.0833816	276000	0.276	8666.67	284667	96.9555	59000	6000	65000	90.7692	4.33499	15.2283	2178.96	99.2167	81.4792	44.6224	126.102	22.8337		1366.67	137.758	219667	160.732	1.83412	10.1807	0.170465	1.75798	0.10943	2.72258	0.411018	3.60099	0.1146	1.12916		0.724865		2.72258		0.75911
	22C	34666.7	0.109353	334667	0.334667	22000	356667	93.8318	35000	9000	44000	79.5455	17.4738	48.992	21549.2	93.9505	94.439	30.2059	124.645	12.3364		1640	135.388	312667	190.65	1.68916	9.3761	0.240761	1.68338	0.0809593	3.70912	0.461793	3.7976	0.0700324	1.9338		0.650265		3.70912		0.5625
	22D	86000	0.252055	386000	0.386	10666.7	396667	97.3109	21000	13000	34000	61.7647	7.22164	18.2058	6434.67	98.3603	108.69	23.341	132.031	8.57143		2096.67	128.456	362667	172.973	1.66919	9.26525	0.220709	1.64713	0.0662797	3.32457	0.35887	3.81566	0.0587694	2.04464		0.614015		3.32457		0.54444
	22E	137333	0.376913	437333	0.437333	13333.3	450667	97.0414	67000	21000	88000	76.1364	7.67514	17.0306	7103.26	98.4017	141.881	60.4119	202.293	19.5266		3591.67	112.134	362667	100.974	1.57086	8.71944	0.246803	2.29602	0.120323	3.43271	0.327049	3.92797	0.0411709	2.59045		1.2629		3.43271		0.43213
Day 2	22B	28000	0.0892311	328000	0.328	6666.67	334667	98.008	23000	17000	40000	57.5	15.1663	45.3175	18147.2	94.7574	76.0833	27.46	103.543	11.9522		560	207.958	294667	526.19	1.59288	8.84167	0.170104	2.42085	0.084206	4.85663	0.271094	2.83357	0.0974873	2.46822		1.38774		4.85663		1.52653
	22C	103000	0.295154	403000	0.403	15000	418000	96.4115	31000	23000	54000	57.4074	32.2688	77.1981	43361	90.2857	80.0326	37.0709	117.104	12.9187		646.667	198.481	364000	562.887	1.3778	7.64782	0.178689	2.27889	0.0615705	5.56701	0.19209	3.18293	0.0635515	3.66208		1.24578		5.56701		1.17717
	22D	163333	0.434664	463333	0.463333	14000	477333	97.067	22000	33000	55000	40	21.4301	44.8954	27381.8	94.42	67.4502	37.7574	105.208	11.5223		393.333	233.634	422333	1073.73	1.44083	7.99768	0.11399	2.37773	0.0657014	5.41062	0.187594	3.07976	0.0661781	3.31221		1.34462		5.41062		1.28034
	22E	166667	0.441833	466667	0.466667	13333.3	480000	97.2222	53000	38000	91000	58.2418	23.2684	48.4758	30091.9	93.9423	123.358	62.4714	185.829	18.9583		1062.5	192.24	389000	366.118	1.22456	6.79722	0.171627	3.05579	0.0678366	5.17067	0.155175	2.95692	0.0867009	4.51267		2.02268		5.17067		1.40318
Day 2 (reseeding)	22A										32000						58.3477	21.968	80.3157			336.667	234.875
	22B			350667	0.350667	6666.67	357333	98.1343	10000	3000	13000	76.9231	1.99007	5.56924	0	100	76.7626	8.92448	85.6871	3.63806	0.846682	565		344333	609.44	2.01686	11.1951		1.39024		0.76134		3.46554		0		0		0		0
	22C			398667	0.398667	10666.7	409333	97.3941	13000	10000	23000	56.5217	7.66743	18.7315	7091.89	98.2522	65.5938	15.7895	81.3832	5.61889	0.802752	530		386333	728.931	1.925	10.6852		1.13991		1.18842		4.43001		0		0		0		0
	22D			422667	0.422667	14666.7	437333	96.6463	20000	9000	29000	68.9655	7.06332	16.1509	6201.27	98.554	78.025	19.9085	97.9335	6.6311	0.75	455		408333	897.436	1.86571	10.3561		1.34525		1.27114		4.05786		0		0		0		0
	22E			396000	0.396	12000	408000	97.0588	14000	3000	17000	82.3529	5.25989	12.8919	3542.51	99.1134	96.2673	11.6705	107.938	4.16667	0.8	829.167		391000	471.558	1.81948	10.0995		1.59795		1.0489		3.72683		0		0		0		0
Day 3 (24h after medium changed)	22A										96000						45.1449	65.9039	111.049			226.667	251.788
	22B	0		325333	0.325333	6666.67	332000	97.992	23000	20000	43000	53.4884	13.7146	41.3092	16007.1	95.3105	41.722	29.5194	71.2414	12.9518		283.333	216.5	289000	1020	1.83802	10.2024	0.127138	1.99458	0.0774001	2.66313	0.243569	3.21496	0.0320927	0.992695		0.60434		1.90179		0.25058
	22C	4000		402667	0.402667	16666.7	419333	96.0254	19000	37000	56000	33.9286	23.1116	55.1151	29860.9	93.0962	45.994	38.4439	84.438	13.3545		286.667	225.989	363333	1267.44	1.78332	9.89875	0.0813772	2.02636	0.091727	3.22759	0.211007	3.35346	0.111398	0.78643		0.88645		2.03917		1.07655
	22D	57333.3		480000	0.48	14666.7	494667	97.035	30000	37000	67000	44.7761	23.409	47.3227	30299.2	94.0625	60.0031	45.9954	105.999	13.5445		275	263.539	427667	1555.15	1.66433	9.23827	0.097032	2.11461	0.0667847	3.2581	0.172479	3.34317	0.0620391	1.11781		0.76936		1.98696		0.71469
	22E	0		376000	0.376	18666.7	394667	95.2703	41000	28000	69000	59.4203	25.387	64.3252	33215.4	91.8832	66.911	47.3684	114.279	17.4831		461.667	214.788	325667	705.415	1.68979	9.37959	0.0797735	2.45452	0.0949213	3.48164	0.269586	2.96358	0.08458	0.719876		0.85657		2.43274		0.76325

## Sheet: µmax &PDT SpF w or wo FBS
	0.125L SpF - RPMI 10% FBS
	ID	time (h)	ln(Xt/X0)	µ	PDT
	15D_7	24	0.303118	0.0029	239.016
		48	0.372636
	15E_7	24	-0.013423	0.0159	43.5942
		48	0.367725
	15E_8	24	0.0973283	0.013	53.319
		48	0.4099
	15F_7	24	0.121234	0.0154	45.0096
		48	0.491983
	15F_8	24	0.406945	0.008	86.6434
		48	0.600057
	15G_7	24	0.267479	0.004	173.287
		48	0.364643
	15G_8	24	0.352221	0.0115	60.2737
		48	0.628905
	0.125L SpF - RPMI adv w/o FBS
	ID	time (h)	ln(Xt/X0)	µ	PDT
	15C_5	24	0.182322
		48	0.154783
	15D_5	24	-0.036203	0.0094	73.7391
		48	0.189702
	15F_5	24	0.117289	0.0015	462.098
		48	0.152244
	15F_6	24	0.140728
		48	-0.040822
	15G_5	24	0.0686965	0.0091	76.17
		48	0.287682
	15G_6	24	-0.013423
		48	-0.00892863
	15H_5	24	-0.0785623	0.0189	36.6745
		48	0.37386
	15H_6	24	-0.0316053	0.0091	76.17
		48	0.186018
	15A_3	24	0.113329	0.0056	123.776
		48	0.24686
	15A_4	24	-0.158605	0.0145	47.8033
		48	0.189702
	15C_3	24	0.200671
		48	0.109353
	15C_4	24	0.0132452	0.0128	54.1521
		48	0.320472
	15D_3	24	-0.036203	0.0087	79.6721
		48	0.172421

## Sheet: 0,125L SpF wo FBS
0.125L SpF : RPMI-1640 advanced w/o FBS + 4mM glutamine
															Y = 0,0006783*X + 2,857
			Cell count total (after trypsine dissociation)						Free cell count													Metabolites
Day	ID	cell-cell0	alive/ml (TRYPSalive)	alive/ml (TRYPSalive) X1e6 cells	ln(xt/X0)	dead/ml (TRYPSdead)	total/ml (TRYPStot)	Viability (BT, %) (Trypsin)	alive free cell/ml (FCalive)	Dead free cell/ml (FCdead)	Total free cell/ml (FCtot)	Viability FC (BT, %) (FC)	LDH (mU/ml)	LDH (mU/e6 total cells)	lysed cells	Viability (based on LDH)	% Free cell	spheroid/ml	spheroid size (µm)	spheroid viable cells (TRYPSalive-FCalive)	cells/spheroid	Glucose (g/l)	Glucose (mM)	Glucose consumption rate ( Δ/1e6 cell) vs T-1	Ammonium (mM)	Ammonium production rate ( Δ/1e6 cell) vs T-1	Lactate (mM)	Lactate production rate ( Δ/1e6 cell) vs T-1	Glutamine (mM)	Glutamine consumption rate ( Δ/1e6 cell) vs T-1	gluc0-gluc	cell = f(gluc)	lac-lac0	GLUC/LAC	glut0-glut	cell = f(glutamine)	Ammonium-Ammonium0	glut/ammonium
Day 0	C - Sp5		300000	0.3		13145.1	313145	95.8594	300000	13145.1	313145	95.8594
	D - Sp5		300000	0.3		8321.17	308321	97.2822	300000	8321.17	308321	97.2822										2.26993	12.5998		0		0.02662		2.23461		0	27175	0	1.1247	0	92842	0	0.9696
	F - Sp5		300000	0.3		7160.8	307161	97.7202	300000	7160.8	307161	97.7202										2.12837	11.814		0.50861		0.01558		3.32475		0	0	0	0.9507	0	0	0	0.6924
	F - Sp6		300000	0.3		7160.8	307161	97.7202	300000	7160.8	307161	97.7202										2.12837	11.814		0.50861		0.01558		3.32475		0	15891	0	0.9139	0	81791	0	1.2081
	G - Sp5		300000	0.3		14906.8	314907	95.2755	300000	14906.8	314907	95.2755										2.17286	12.061		0		0		4.31563		0	23598	0	1.0022	0	65576	0	0.8171
	G - Sp6		300000	0.3		14906.8	314907	95.2755	300000	14906.8	314907	95.2755										2.17286	12.061		0		0		4.31563		0	2776.5	0	0.9525	0	10498	0	0.8695
	H - Sp5		300000	0.3		12917.6	312918	95.6361	300000	12917.6	312918	95.6361										1.99576	11.078		0.41165		0		5.11378		0	17511	0	1.1869	0	8755	0	1.1891
	H - Sp6		300000	0.3		12917.6	312918	95.6361	300000	12917.6	312918	95.6361										1.99576	11.078		0.41165		0		5.11378		0	6799.7	0	1.0861	0	9287.1	0	1.0095
Day 1	C - Sp5	60000	360000	0.36	0.182322	21333.3	381333	94.4056	28000	4000	32000	87.5	21.1775	55.5353	27009.4	93.021	8.39161	1993.33	122.059	332000	166.555	1.71462	9.51742	/	0.09661	/	4.26794	/	1.89699	/	/		/		/		/
	D - Sp5	0	289333	0.289333	-0.036203	8000	297333	97.3094	8000	8000	16000	50	5.51828	18.5592	3923.46	98.6621	5.38117	1646.67	163.16	281333	170.85	1.82758	10.1444	0.353596	0	0	2.65494	0.378502	1.99363	0.0347033	2.45537		2.62832		0.24098		0
	F - Sp5	37333.3	337333	0.337333	0.117289	24000	361333	93.3579	16000	10000	26000	61.5385	5.50287	15.2294	3900.74	98.8569	7.19557	1616.67	144.809	321333	198.763	1.86224	10.3368	0.182463	0.99288	0.059816	3.71285	0.456679	2.88977	0.0537278	1.47722		3.69727		0.43498		0.48427
	F - Sp6	45333.3	345333	0.345333	0.140728	6666.67	352000	98.1061	28000	8000	36000	77.7778	5.79023	16.4495	4324.38	98.7633	10.2273	1558.33	161.612	317333	203.636	1.87976	10.4341	0.166502	1.04913	0.0652172	3.56569	0.428343	2.56757	0.0913586	1.37997		3.55011		0.75718		0.54052
	G - Sp5	21333.3	321333	0.321333	0.0686965	6666.67	328000	97.9675	22000	10000	32000	68.75	6.8287	20.8192	5855.38	98.2104	9.7561	2025	157.524	299333	147.819	1.74767	9.70087	0.306032	0.54916	0.0712085	3.44647	0.446897	3.38271	0.12097	2.36012		3.44647		0.93292		0.54916
	G - Sp6	0	296000	0.296	-0.013423	0	296000	100	22000	0	22000	100	8.25231	27.8794	7954.17	97.3831	7.43243	1550	142.278	274000	176.774	1.82705	10.1415	0.2702	0.49621	0.0698494	3.75193	0.528143	3.5043	0.114207	1.9195		3.75193		0.81133		0.49621
	H - Sp5	0	277333	0.277333	-0.0785623	8000	285333	97.1963	10000	6000	16000	62.5	10.358	36.3015	11058.6	96.1654	5.60748	3250	136.085	267333	82.2564	1.71253	9.50582	0.236199	1.21791	0.121133	2.6837	0.4032	4.19066	0.13869	1.57214		2.6837		0.92312		0.80626
	H - Sp6	0	290667	0.290667	-0.0316053	13333.3	304000	95.614	4000	2000	6000	66.6667	10.9136	35.8999	11877.6	96.0741	1.97368	1783.33	119.467	286667	160.748	1.78935	9.93223	0.164239	1.20073	0.113114	2.99915	0.429924	4.34644	0.109997	1.14573		2.99915		0.76734		0.78908
Day 2	C - Sp5	50221.3	350221	0.350221	0.154783	23120	373341	93.8073	46000	12000	58000	79.3103	73.0225	195.592	103443	77.1983	15.5354	620	180.712	304221	490.68	1.33913	7.43317	/	0.56489	/	6.90629	/	1.42031	/
	D - Sp5	62666.7	362667	0.362667	0.189702	9333.33	372000	97.491	18000	4000	22000	81.8182	20.2925	54.5497	25704.7	93.3814	5.91398	364.444	222.17	344667	945.732	1.60186	8.89152	0.143947	0.35266	0.040517	4.51735	0.213972	1.66938	0.037253	3.70829		4.49073		0.56523		0.35266
	F - Sp5	49333.3	349333	0.349333	0.152244	17333.3	366667	95.2727	10000	8000	18000	55.5556	15.4167	42.0455	18516.4	94.9663	4.90909	616.667	191.07	339333	550.27	1.46557	8.13501	0.262621	1.41278	0.0500835	5.78477	0.247128	2.50024	0.0464611	3.67903		5.76919		0.82451		0.90417
	F - Sp6	0	288000	0.288	-0.040822	22666.7	310667	92.7039	14000	20000	34000	41.1765	15.6753	50.4569	18897.7	93.8424	10.9442	804.167	197.238	274000	340.725	1.51218	8.39373	0.295188	1.46209	0.0597454	5.40621	0.266279	2.17424	0.0569054	3.42031		5.39063		1.15051		0.95348
	G - Sp5	100000	400000	0.4	0.287682	8000	408000	98.0392	32000	16000	48000	66.6667	27.7662	68.0544	36723	91.5912	11.7647	479.167	213.745	368000	768	1.52558	8.46811	0.128413	1.05122	0.0522979	5.89934	0.255507	2.92293	0.0478937	3.59289		5.89934		1.3927		1.05122
	G - Sp6	0	297333	0.297333	-0.00892863	14666.7	312000	95.2991	20000	20000	40000	50	23.3912	74.9718	30273	90.7593	12.8205	329.167	227.832	277333	842.532	1.33615	7.41663	0.381847	0.9469	0.0631572	6.22907	0.347133	2.77164	0.102671	4.64436		6.22907		1.54399		0.9469
	H - Sp5	136000	436000	0.436	0.37386	24000	460000	94.7826	24000	14000	38000	63.1579	27.1173	58.9506	35766.3	92.4186	8.26087	1137.5	189.346	412000	362.198	1.45909	8.09904	0.13444	2.02904	0.0775162	4.31976	0.156351	3.53122	0.0630199	2.97892		4.31976		1.58256		1.61739
	H - Sp6	61333.3	361333	0.361333	0.186018	26666.7	388000	93.1271	22000	14000	36000	61.1111	21.6852	55.8897	27757.9	92.866	9.27835	812.5	198.639	339333	417.641	1.409	7.821	0.243453	1.8813	0.078479	4.91786	0.221253	3.56811	0.0897521	3.25696		4.91786		1.54567		1.46965
Day 3	C - Sp5	142667	442667	0.442667		21333.3	464000	95.4023	16000	18000	34000	47.0588	121.825	262.555	175392	71.6221	7.32759	350	262.929	426667	1219.05	1.01007	5.60664	/	0.98173	/	8.38109	/	1.00154	/
	D - Sp5	69333.3	369333	0.369333		8000	377333	97.8799	16000	8000	24000	66.6667	47.5828	126.103	65938.1	84.8513	6.36042	110	278.237	353333	3212.12	1.3697	7.60286	0.145381	0.70396	0.0396322	5.51776	0.112862	1.27024	0.0450293	4.99695		5.49114		0.96437		0.70396
	F - Sp5	12000	312000	0.312		21333.3	333333	93.6	6000	16000	22000	27.2727	30.0431	90.1293	40079.8	88.6163	6.6	420	247.744	306000	728.571	1.26026	6.99538	0.152193	1.88165	0.0626162	6.89459	0.148213	1.65372	0.11305	4.81866		6.87901		1.67103		1.37304
	F - Sp6	110667	410667	0.410667		25333.3	436000	94.1896	8000	18000	26000	30.7692	29.8994	68.5767	39867.9	91.151	5.9633	323.333	262.284	402667	1245.36	1.27334	7.06799	0.134511	2.0543	0.0600862	6.64555	0.125745	1.73366	0.0447017	4.74605		6.62997		1.59109		1.54569
	G - Sp5	100000	400000	0.4		5333.33	405333	98.6842	12000	16000	28000	42.8571	51.2384	126.411	71327.5	84.8667	6.90789	233.333	234.307	388000	1662.86	1.19394	6.62726	0.191755	1.47615	0.0442635	6.67754	0.0810625	2.26549	0.0684833	5.43374		6.67754		2.05014		1.47615
	G - Sp6	13333.3	313333	0.313333		13333.3	326667	95.9184	30000	16000	46000	65.2174	41.0995	125.815	56380	84.7504	14.0816	443.333	232.506	283333	639.098	1.06914	5.93452	0.197088	1.45151	0.0671024	7.78485	0.206886	2.47655	0.0392407	6.12647		7.78485		1.83908		1.45151
	H - Sp5	8000	308000	0.308		9333.33	317333	97.0588	20000	22000	42000	47.619	49.9877	157.524	69483.5	81.593	13.2353	450	213.9	288000	640	1.33495	7.40997	0.0932183	2.73124	0.0949946	5.17994	0.116366	2.91739	0.0830398	3.66799		5.17994		2.19639		2.31959
	H - Sp6	0	212000	0.212		12000	224000	94.6429	12000	10000	22000	54.5455	35.2037	157.159	47687.9	81.6365	9.82143	330	249.467	200000	606.061	1.28425	7.12854	0.136096	2.44744	0.11127	6.19618	0.251242	3.13309	0.0854992	3.94941		6.19618		1.98069		2.03579

## Sheet: 0,125L SpF 10% FBS
0.125L SpF : RPMI-1640 + 10% FBS + 2mM glutamine
															Y = 0,0006783*X + 2,857
		Cell count total (after trypsine dissociation)							Free cell count														Metabolites
Day	ID	alive/ml (TRYPSalive)	cell-cell0	alive/ml (TRYPSalive) x1e6	ln(xt/X0)	dead/ml (TRYPSdead)	total/ml (TRYPStot)	Viability (BT, %) (Trypsin)	alive free cell/ml (FCalive)	Dead free cell/ml (FCdead)	Total free cell/ml (FCtot)	Viability FC (BT, %) (FC)	LDH (mU/ml)	LDH (mU/e6 total cells)	lysed cells LDH	Viability (based on LDH)	% Free cell	% cells in spheroid	spheroid/ml	spheroid size (µm)	spheroid cells (TRYPStot-FCtot)	cells/spheroid	Glucose (g/l)	glucose (mM)	Glucose consumption rate ( Δ/1e6 cell) vs T-1	Ammonium (mM)	Ammonium production rate	Lactate (mM)	Lactate production rate	Glutamine (mM)	Glutamine consumption rate	gluc0-gluc	cell = f(glucose)	lac-lac0	GLUC/LAC	glut0-glut	cell = f(glutamine)	Ammonium-Ammonium0	Ammonium = f(glutamine)
Day 0	D - Sp7	300000		0.3		8321.17	308321	97.2822	300000	8321.17	308321	97.2822											2.08062	11.549		0		1.77423		2.24251		0	43015	0	0.7688	0	150088	0	0.9987
	E - Sp7	300000		0.3		13454.2	313454	95.6985	300000	13454.2	313454	95.6985											2.1103	11.7137		0		1.9037		2.1474		0	27128	0		0	89116	0	0.4572
	E - Sp8	300000		0.3		13454.2	313454	95.6985	300000	13454.2	313454	95.6985											2.1103	11.7137		0		1.9037		2.1474		0	42380	0	0.7405	0	114108	0	0.9056
	F - Sp7	300000		0.3		7160.8	307161	97.7202	300000	7160.8	307161	97.7202											2.08827	11.5915		0		1.83641		1.98842		0	43838	0	0.8731	0	185419	0	0.9551
	F - Sp8	300000		0.3		7160.8	307161	97.7202	300000	7160.8	307161	97.7202											2.08827	11.5915		0		1.83641		1.98842		0	25731	0	0.8755	0	206919	0	1.0722
	G - Sp7	300000		0.3		14906.8	314907	95.2755	300000	14906.8	314907	95.2755											2.03457	11.2934		0		1.87698		2.20437		0	26252	0	0.9369	0	131093	0	0.881
	G - Sp8	300000		0.3		14906.8	314907	95.2755	300000	14906.8	314907	95.2755											2.03457	11.2934		0		1.87698		2.20437		0	16749	0	1.0341	0	96916	0	0.8721
Day 1	D - Sp7	406222	106222	0.406222	0.303118	8888.89	415111	97.8587	8000	2000	10000	80	/	/	/	/	2.40899	97.591	1280	153.159	405111	316.493	1.69749	9.42233	0.218134	0.15603	0.0160042	5.2499	0.356503	2.19718	0.00464955	2.12666		3.47567		0.04533		0.15603
	E - Sp7	296000	0	0.296	-0.013423	12000	308000	96.1039	28000	2000	30000	93.3333	10.4359	33.8828	11173.4	96.3625	9.74026	90.2597	2373.33	143.752	278000	117.135	1.64836	9.14963	0.360939	0.10923	0.0153758	4.70568	0.394423	1.73039	0.0587007	2.56411		2.80198		0.41701		0.10923
	E - Sp8	330667	30666.7	0.330667	0.0973283	4000	334667	98.8048	28000	2000	30000	93.3333	18.2885	54.6468	22750.2	93.5628	8.96414	91.0359	2233.33	155.056	304667	136.418	1.81522	10.0758	0.20639	0.1326	0.0167087	5.24376	0.420874	1.97497	0.0217276	1.63791		3.34006		0.17243		0.1326
	F - Sp7	338667	38666.7	0.338667	0.121234	42666.7	381333	88.8112	22000	0	22000	100	3.37428	8.84864	762.613	99.7753	5.76923	94.2308	3075	134.105	359333	116.856	1.64712	9.14274	0.301269	0.15417	0.0189678	5.36884	0.4346	1.89015	0.0120903	2.44871		3.53243		0.09827		0.15417
	F - Sp8	450667	150667	0.450667	0.406945	34666.7	485333	92.8571	28000	4000	32000	87.5	3.28791	6.77454	635.276	99.8592	6.59341	93.4066	2300	141.291	453333	197.101	1.67417	9.29289	0.212515	0.16196	0.0149741	5.47193	0.336124	1.85825	0.0120349	2.29856		3.63552		0.13017		0.16196
	G - Sp7	392000	92000	0.392	0.267479	6666.67	398667	98.3278	12000	4000	16000	75	7.84738	19.6841	7357.19	98.1577	4.01338	95.9866	2308.33	164.811	382667	165.776	1.66025	9.21562	0.22085	0.26631	0.0283068	5.84841	0.422133	1.87828	0.0346609	2.07775		3.97143		0.32609		0.26631
	G - Sp8	426667	126667	0.426667	0.352221	5333.33	432000	98.7654	20000	8000	28000	71.4286	11.4692	26.5492	12696.8	97.1102	6.48148	93.5185	1700	153.244	404000	237.647	1.6569	9.19703	0.204722	0.25443	0.0248467	5.99682	0.402328	1.85167	0.0344434	2.09635		4.11984		0.3527		0.25443
Day 2	D - Sp7	435467	135467	0.435467	0.372636	45333.3	480800	90.5713	32000	0	32000	100	5.54462	11.5321	3962.29	99.0983	6.65557	93.3444	488.889	203.132	448800	918	1.35437	7.51776	0.182235	0.60683	0.0431338	6.65914	0.13484	1.69376	0.0481686	4.03123		4.88491		0.54875		0.60683
	E - Sp7	433333	133333	0.433333	0.367725	24000	457333	94.7522	16000	16000	32000	50	8.09615	17.703	7723.95	98.2488	6.99708	93.0029	787.5	197.67	425333	540.106	1.34876	7.48662	0.159904	0.60824	0.0479817	6.95886	0.216652	1.45623	0.0263615	4.22711		5.05516		0.69117		0.60824
	E - Sp8	452000	152000	0.452	0.4099	22666.7	474667	95.2247	22000	8000	30000	73.3333	9.08974	19.1497	9188.77	98.0076	6.32022	93.6798	987.5	203.479	444667	450.295	1.33594	7.41546	0.24524	0.61758	0.0447069	6.94523	0.156846	1.37529	0.0552802	4.29827		5.04153		0.77211		0.61758
	F - Sp7	490667	190667	0.490667	0.491983	21333.3	512000	95.8333	205	8000	36000	77.7778	8.49904	16.5997	8317.91	98.333	7.03125	92.9688	808.333	169.48	476000	588.866	/	/	/	0.59618	0.0375348	7.33961	0.167355	1.3558	0.0453762			5.5032		0.63262		0.59618
	F - Sp8	546667	246667	0.546667	0.600057	25333.3	572000	95.5711	34000	14000	48000	70.8333	6.65643	11.6371	5601.4	98.9857	8.39161	91.6084	737.5	179.535	524000	710.508	1.30301	7.23268	0.157029	0.59664	0.0331311	7.38805	0.146046	1.40467	0.0345716	4.35878		5.55164		0.58375		0.59664
	G - Sp7	432000	132000	0.432	0.364643	28000	460000	93.913	42000	10000	52000	80.7692	12.9043	28.0529	14812.5	96.6848	11.3043	88.6957	745.833	211.942	408000	547.039	1.20108	6.66689	0.245827	0.66831	0.0387731	8.10807	0.217946	1.36955	0.0490673	4.62649		6.23109		0.83482		0.66831
	G - Sp8	562667	262667	0.562667	0.628905	28000	590667	95.2596	10000	6000	16000	62.5	14.8861	25.2022	17734.2	96.9445	2.7088	97.2912	841.667	192.934	574667	682.772	1.19928	6.6569	0.188102	0.6641	0.0303369	8.51906	0.186777	1.25403	0.0442565	4.63648		6.64208		0.95034		0.6641
Day 3	D - Sp7	545333	245333	0.545333	0.597615	25333.3	570667	95.5607	8000	20000	28000	28.5714	31.7002	55.5495	42522.8	92.7665	4.90654	95.0935	470	192.614	542667	1154.61	1.15949	6.43603	0.0826505	1.061	0.0347013	7.55686	0.0685911	1.29519	0.0304531	5.11296		5.78263		0.94732		1.061
	E - Sp7	420453	120453	0.420453	0.337551	31120	451573	93.1085	22000	12000	34000	64.7059	22.5833	50.0103	29082	93.5306	7.52923	92.4708	673.333	203.975	417573	620.158	0.6274	3.48254	0.396802	0.64478	0.00362109	5.19155	-0.175139	0.7649	0.0685104	8.2312		3.28785		1.3825		0.64478
	E - Sp8	412453	112453	0.412453	0.318341	65786.7	478240	86.244	16000	10000	26000	61.5385	23.7372	49.6345	30783.1	93.0549	5.4366	94.5634	750	212.828	452240	602.987	1.15576	6.41533	0.101035	1.05978	0.0446717	8.05003	0.111609	0.9594	0.0420138	5.29841		6.14633		1.188		1.05978
	F - Sp7	432000	132000	0.432	0.364643	29333.3	461333	93.6416	32000	6000	38000	84.2105	28.4511	61.6714	37732.6	91.9672	8.23699	91.763	636.667	182.82	423333	664.921	1.00661	5.58744	/	1.03499	0.0423235	8.47292	0.109308	0.97653	0.0365808	6.00402		6.63651		1.01189		1.03499
	F - Sp8	604000	304000	0.604	0.699792	52000	656000	92.0732	24000	20000	44000	54.5455	28.6238	43.6338	37987.3	94.0829	6.70732	93.2927	343.333	200.217	612000	1782.52	1.01893	5.65582	0.108779	1.05624	0.0317053	8.64575	0.0867619	1.02725	0.0260361	5.93563		6.80934		0.96117		1.05624
	G - Sp7	581333	281333	0.581333	0.661542	14666.7	596000	97.5391	26000	10000	36000	72.2222	34.3964	57.712	46497.6	92.5939	6.04027	93.9597	620	200.1	560000	903.226	0.94291	5.23385	0.102712	1.04706	0.0271466	9.60542	0.107322	0.99776	0.0266478	6.05953		7.72844		1.20661		1.04706
	G - Sp8	510667	210667	0.510667	0.531935	14666.7	525333	97.2081	32000	8000	40000	80	38.9066	74.0608	53147	90.5737	7.61421	92.3858	443.333	192.784	485333	1094.74	0.95629	5.30812	0.11005	1.0015	0.0275294	10.042	0.124264	1.04366	0.0171647	5.98526		8.16506		1.16071		1.0015

## Sheet: LDH Analyzis
STANDARD CURVE LDH (mu/mL)
		standard LDH (mU/mL)
Buffer	Proto ID	50	25	12.5	6.25	3.125	1.5625	0.78125
RPMI + 10% FBS	LDH3	2.34975	1.33825	0.69125	0.35575	0.18525	0.08575	0.04825
	15E	2.34267	1.28567	0.676667	0.349333	0.179667	0.0993333	0.0383333
	15F	2.60233	1.57267	0.818333	0.429667	0.220667	0.131333	0.0796667
	15G	2.16917	1.21283	0.621167	0.304167	0.143167	0.0631667	0.0295
	15H	2.37567	1.377	0.722	0.381	0.203	0.106333	0.066
	mean	2.36792	1.35728	0.705883	0.363983	0.18635	0.0971833	0.05235
STANDARD CURVE LYSED CELLS (cells/mL)
		standard cells (cells/mL)
Buffer	Protocol ID	Culture condition	200000	100000	50000	25000	12500	6250	3125	1562.5
	LDH1	ML1	4.047	2.389	1.377	0.704667	0.340333	0.161333	0.076
	LDH2	ML2	3.15112	2.01963	1.15112	0.599625	0.290625	0.140625	0.142625	0.136625
	LDH2	ML3	3.21163	2.07962	1.14763	0.596625	0.296625	0.144125	0.067625	0.044625
		standard curve 2	73469.4	31486.9	13494.4	5783.3	2478.56	1062.24	455.246
		ML4	1.93875	0.92575	0.39325	0.15825	0.07175	0.03025	0.00625
	LDH2	spheroids1		3.39563	2.15563	1.20713	0.876625	0.434125	0.212625	0.099625
	LDH2	spheroids3		3.41312	2.15912	1.20063	0.616125	0.302625	0.147125	0.069625
	LDH2	spheroids4		2.61612	1.63413	0.879125	0.430125	0.215125	0.117125	0.073125
	LDH1	spheroids2		2.88267	1.74767	0.912333	0.443333	0.196	0.0943333
f(cells) = LDH
		Culture condition	200000	100000	50000	25000	12500	6250	3125	1562.5
		ML1	88.9159	52.2345	29.8451	14.9705	6.91003	2.94985	1.06195
		ML2	69.0957	44.0625	24.8479	12.6466	5.81029	2.4917	2.53595	2.40321
		ML3	70.4342	45.3899	24.7705	12.5802	5.94303	2.56914	0.876659	0.36781
			73469.4	31486.9	13494.4	5783.3	2478.56	1062.24	455.246
		M4	42.2732	19.8617	8.08075	2.88164	0.96792	0.0497788	0
			200000	100000	50000	25000	12500	6250	3125	1562.5
		spheroids1	SATURE	74.505	47.0713	26.0868	18.7749	8.98507	4.08462	1.58462
		spheroids3	SATURE	74.8921	47.1488	25.943	13.0116	6.07577	2.63551	0.920907
		spheroids4	SATURE	57.2594	35.5337	18.8302	8.89657	4.13993	1.97179	0.998341
		spheroids2	SATURE	63.1563	38.0457	19.5649	9.18879	3.71681	1.46755

[truncated: 3 more sheets: Monolayer viability LDH, µmax monolayer, Monolayer]
